# Supplementary material
Source: PubMed Central journal article supplement (PMC3158295)
Supplement: NIHMS312032-supplement-1.pdf [file NIHMS312032-supplement-1.pdf]

## Supplement Material

**Supplementary Table I.** Pearson's correlation coefficients of markers of systemic and vascular inflammation with each other.

|                              | CRP    | SAA     | Fibrinogen | Lp-PLA <sub>2</sub> mass | Lp-PLA <sub>2</sub> activity | PTX-3  |
|------------------------------|--------|---------|------------|--------------------------|------------------------------|--------|
| <b>Caucasians</b>            |        |         |            |                          |                              |        |
| CRP                          | -      | 0.728*  | 0.643*     | 0.069                    | -0.095                       | 0.301* |
| SAA                          | 0.728* | -       | 0.547*     | -0.016                   | -0.158*                      | 0.273* |
| Fibrinogen                   | 0.643* | 0.547*  | -          | 0.035                    | -0.002                       | 0.199* |
| Lp-PLA <sub>2</sub> mass     | 0.069  | -0.016  | 0.035      | -                        | 0.447*                       | 0.016  |
| Lp-PLA <sub>2</sub> activity | -0.095 | -0.158* | -0.002     | 0.447*                   | -                            | -0.138 |
| PTX-3                        | 0.301* | 0.273*  | 0.199*     | 0.016                    | -0.138                       | -      |
| <b>African Americans</b>     |        |         |            |                          |                              |        |
| CRP                          | -      | 0.662*  | 0.654*     | -0.003                   | 0.148                        | 0.147  |
| SAA                          | 0.662* | -       | 0.584*     | 0.083                    | 0.140                        | 0.209* |
| Fibrinogen                   | 0.654* | 0.584*  | -          | -0.020                   | 0.116                        | 0.203* |
| Lp-PLA <sub>2</sub> mass     | -0.003 | 0.083   | -0.020     | -                        | 0.403*                       | 0.055  |
| Lp-PLA <sub>2</sub> activity | 0.148  | 0.140   | 0.116      | 0.403*                   | -                            | 0.134  |
| PTX-3                        | 0.147  | 0.209*  | 0.203*     | 0.055                    | 0.134                        | -      |

Data for CRP, SAA, Lp-PLA<sub>2</sub> and PTX-3 were logarithmically transformed to normalize the distribution of marker values before statistical analyses. \*, correlation is significant at the 0.01 level;
