# Supplementary material
Source: PubMed Central journal article supplement (PMC3158295)
Supplement: NIHMS312032-supplement-2.pdf [file NIHMS312032-supplement-2.pdf]

## Supplement Material

**Supplementary Table II.** Logistic regression analysis relating each marker of systemic and vascular inflammation to the presence of CAD across ethnicity.

| Inflammatory markers                      | Caucasians           |          | African Americans   |          |
|-------------------------------------------|----------------------|----------|---------------------|----------|
|                                           | OR (95% CI)          | <i>P</i> | OR (95% CI)         | <i>P</i> |
| CRP, mg/L                                 | 1.068 (0.882-1.293)  | 0.502    | 1.270 (1.014-1.591) | 0.038    |
| SAA, mg/L                                 | 1.086 (0.908-1.299)  | 0.365    | 1.212 (1.003-1.466) | 0.047    |
| Fibrinogen, mg/dL                         | 1.003 (1.000-1.006)  | 0.030    | 1.003 (1.000-1.005) | 0.025    |
| Lp-PLA <sub>2</sub> mass, ng/mL           | 2.264 (0.946-5.416)  | 0.066    | 0.623 (0.242-1.599) | 0.325    |
| Lp-PLA <sub>2</sub> activity, nmol/min/mL | 5.051 (2.029-12.578) | 0.001    | 2.853 (1.038-7.841) | 0.042    |
| PTX-3, ng/mL                              | 0.947 (0.705-1.273)  | 0.720    | 0.846 (0.625-1.146) | 0.281    |

Data for CRP, SAA, Lp-PLA<sub>2</sub> and PTX-3 were logarithmically transformed to normalize the distribution of marker values before statistical analyses. CI, Confidence interval.
